# Supplementary material for: Unprecedented layered coordination polymers of dithiolene group 10 metals: magnetic and electrical properties
Source: Royal Society of Chemistry journal article supplement (doi:10.1039/c6dt00464d), 2016-01-01
Supplement: c6dt00464d1.pdf [file c6dt00464d1.pdf]

# ELECTRONIC SUPPORTING INFORMATION

## Unprecedented Layered Coordination Polymers of Dithiolene Group 10 Metals. Magnetic and Electrical Properties

*Esther Delgado,<sup>\*,a</sup> Carlos J. Gómez-García,<sup>b</sup> Diego Hernández,<sup>a</sup> Elisa Hernández,<sup>a</sup>  
Avelino Martín,<sup>c</sup> and Félix Zamora<sup>a,d</sup>*

a) Departamento de Química Inorgánica, Universidad Autónoma de Madrid, 28049 Madrid, Spain. Tel: 34 91 4975268; E-mail: esther.delgado@uam.es.

b) Instituto de Ciencia Molecular. Universidad de Valencia. C/ Catedrático José Beltrán, 2. 46980 Paterna, Valencia, Spain.

c) Departamento de Química Inorgánica, Universidad de Alcalá. Campus Universitario, E-28871, Alcalá de Henares, Spain.

d) Instituto Madrileño de Estudios Avanzados en Nanociencia (IMDEA Nanociencia), Cantoblanco, 28049 Madrid, Spain.

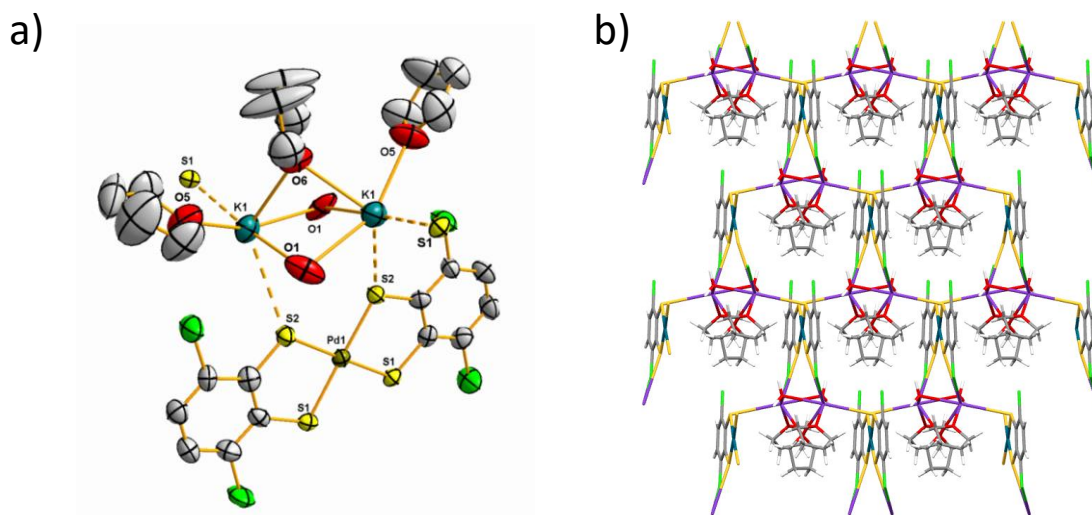

**Figure S1.** (a) ORTEP of  $\{[K_2(\mu-H_2O)_2(\mu-thf)(thf)_2][Pd(SC_6H_2Cl_2S)_2]\}_n$  (**2**). (b) Representation of the bidimensional network of  $\{[K_2(\mu-H_2O)_2(\mu-thf)(thf)_2][Pd(SC_6H_2Cl_2S)_2]\}_n$  (**2**).

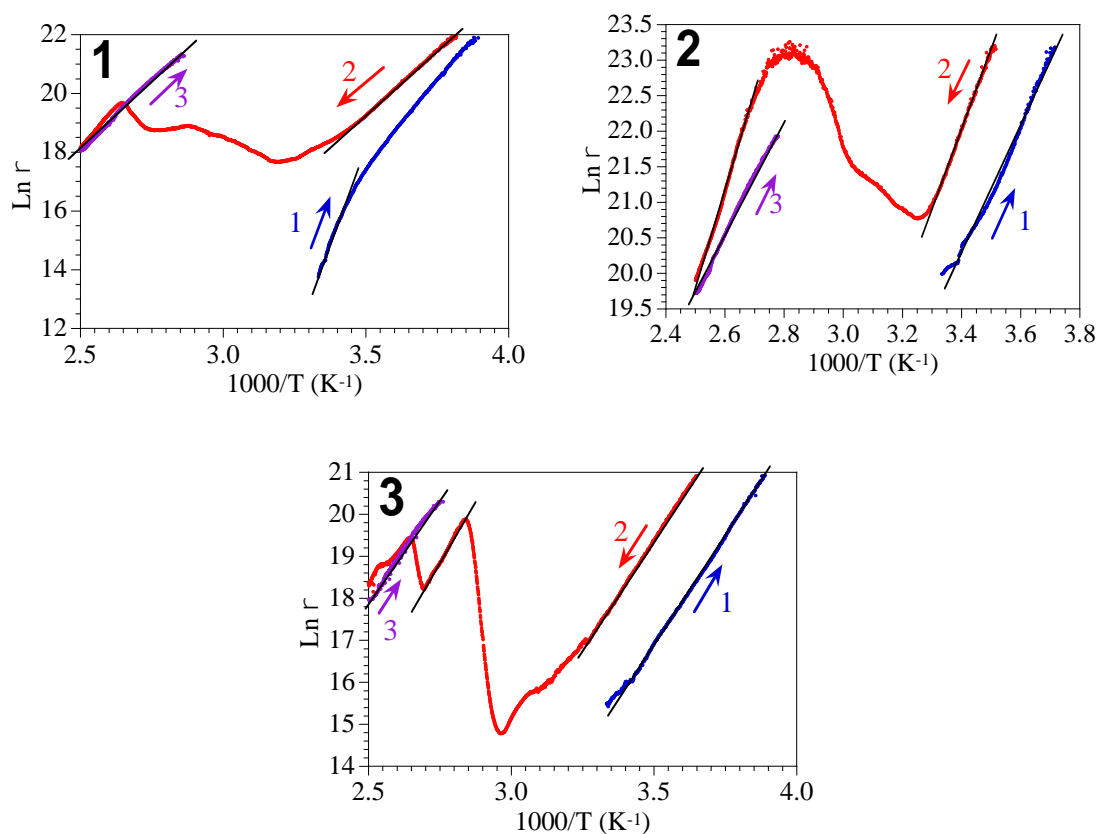

**Figure S2.** Arrhenius plots of compounds 1-3 showing the semiconducting regimes in the different cooling and heating scans.

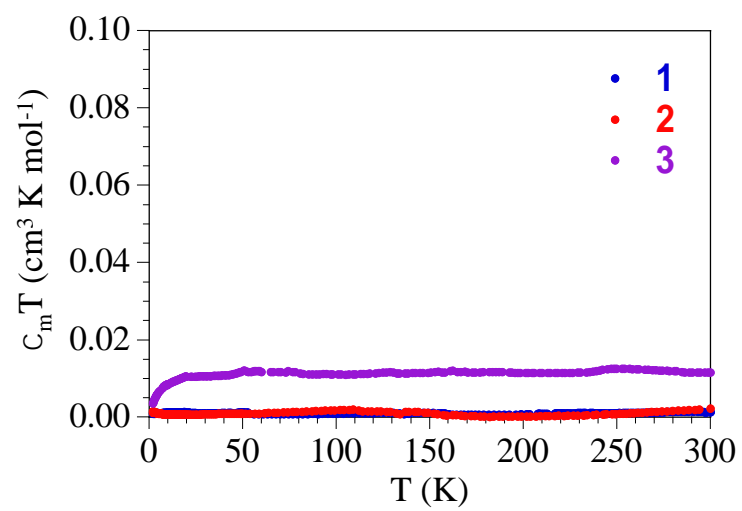

**Figure S3.** Thermal variation of the  $\chi_m T$  product of compounds **1-3**.

**Table S1.** Crystal data and structure refinement for compounds **1-4**.

| <b>Compound</b>                                                              | <b>1</b>                                                                                       | <b>2</b>                                                                                       | <b>3</b>                                                                                       | <b>4</b>                                                                                       |
|------------------------------------------------------------------------------|------------------------------------------------------------------------------------------------|------------------------------------------------------------------------------------------------|------------------------------------------------------------------------------------------------|------------------------------------------------------------------------------------------------|
| <i>moiety formula</i>                                                        | C <sub>24</sub> H <sub>28</sub> Cl <sub>4</sub> K <sub>2</sub> NiO <sub>5</sub> S <sub>4</sub> | C <sub>24</sub> H <sub>32</sub> Cl <sub>4</sub> K <sub>2</sub> O <sub>5</sub> PdS <sub>4</sub> | C <sub>36</sub> H <sub>56</sub> Cl <sub>4</sub> K <sub>2</sub> O <sub>8</sub> PtS <sub>4</sub> | C <sub>20</sub> H <sub>22</sub> Cl <sub>4</sub> K <sub>2</sub> O <sub>3</sub> PTs <sub>4</sub> |
| <i>formula weight</i>                                                        | 807.44                                                                                         | 855.13                                                                                         | 1160.13                                                                                        | 853.7                                                                                          |
| <i>temperature [K]</i>                                                       | 200                                                                                            | 200                                                                                            | 200                                                                                            | 200                                                                                            |
| <i>wavelength (MoK<math>\alpha</math>) [<math>\text{\AA}</math>]</i>         | 0.71073                                                                                        | 0.71073                                                                                        | 0.71073                                                                                        | 0.71073                                                                                        |
| <i>crystal system</i>                                                        | monoclinic                                                                                     | monoclinic                                                                                     | monoclinic                                                                                     | triclinic                                                                                      |
| <i>space group</i>                                                           | C2/c                                                                                           | C2/c                                                                                           | P2 <sub>1</sub> /c                                                                             | P-1                                                                                            |
| <i>a [<math>\text{\AA}</math>]; <math>\alpha</math>(<math>^\circ</math>)</i> | 9.064(3)                                                                                       | 9.064(3)                                                                                       | 13.933(5)                                                                                      | 8.2056(7); 82.782(5)                                                                           |
| <i>b [<math>\text{\AA}</math>]; <math>\beta</math>(<math>^\circ</math>)</i>  | 14.446(5); 97.27(1)                                                                            | 14.446(5); 97.27(1)                                                                            | 9.234(3); 99.24(2)                                                                             | 12.704(1); 74.848(5)                                                                           |
| <i>c [<math>\text{\AA}</math>]; <math>\gamma</math>(<math>^\circ</math>)</i> | 26.473(4)                                                                                      | 26.473(4)                                                                                      | 18.4983(7)                                                                                     | 14.4749(8); 76.633(7)                                                                          |
| $\mu$ (mm <sup>-1</sup> )                                                    | 1.393                                                                                          | 1.365                                                                                          | 3.614                                                                                          | 5.954                                                                                          |
| <i>Z ; F(000)</i>                                                            | 4; 1656                                                                                        | 4; 1728                                                                                        | 2; 1168                                                                                        | 2; 828                                                                                         |
| <i>crystal size [mm<sup>3</sup>]</i>                                         | 0.26 x 0.24 x 0.14                                                                             | 0.10 x 0.10 x 0.10                                                                             | 0.36 x 0.30 x 0.29                                                                             | 0.38 x 0.26 x 0.13                                                                             |
| <i><math>\theta</math> range</i>                                             | 3.10 to 27.55 $^\circ$                                                                         | 3.10 to 27.74 $^\circ$                                                                         | 3.14 to 27.62 $^\circ$                                                                         | 3.26 to 27.5 $^\circ$                                                                          |
| <i>index ranges</i>                                                          | -11 to 11, -18 to 18,<br>-34 to 34                                                             | -11 to 11, -18 to 18,<br>-12 to 34                                                             | -18 to 17, -11 to 11,<br>0 to 24                                                               | -10 to 10, -16 to 16,<br>-18 to 17                                                             |
| <i>collected reflections</i>                                                 | 26810                                                                                          | 35756                                                                                          | 44170                                                                                          | 30685                                                                                          |
| <i>independent reflections</i>                                               | 3952 [R <sub>int</sub> = 0.061]                                                                | 3939 [R <sub>int</sub> = 0.144]                                                                | 5405 [R <sub>int</sub> = 0.089]                                                                | 6479 [R <sub>int</sub> = 0.094]                                                                |
| <i>goodness-of-fit on F<sup>2</sup></i>                                      | 1.081                                                                                          | 1.045                                                                                          | 0.948                                                                                          | 1.228                                                                                          |
| <i>final R indices [F &gt; 4<math>\sigma</math>(F)]</i>                      | R1=0.081,wR2=0.212                                                                             | R1=0.095,wR2=0.241                                                                             | R1=0.042,wR2=0.085                                                                             | R1=0.064,wR2=0.144                                                                             |
| <i>R indices (all data)</i>                                                  | R1=0.124,wR2=0.228                                                                             | R1=0.173,wR2=0.269                                                                             | R1=0.082,wR2=0.097                                                                             | R1=0.099,wR2=0.158                                                                             |
| <i>largest diff. peak/hole [e<math>\text{\AA}</math><sup>-3</sup>]</i>       | 1.331 / -1.000                                                                                 | 1.693 / -0.995                                                                                 | 1.393/-2.331                                                                                   | 2.900 / -1.894                                                                                 |
